# Supplementary material for: Whole blood viscosity is associated with extrahepatic metastases and survival in patients with hepatocellular carcinoma
Source: PLOS journal article supplement (doi:10.1371/journal.pone.0260311), 2021-12-02
Supplement: S1 (10.1371/journal.pone.0260311.s001) [file journal.pone.0260311.s001]

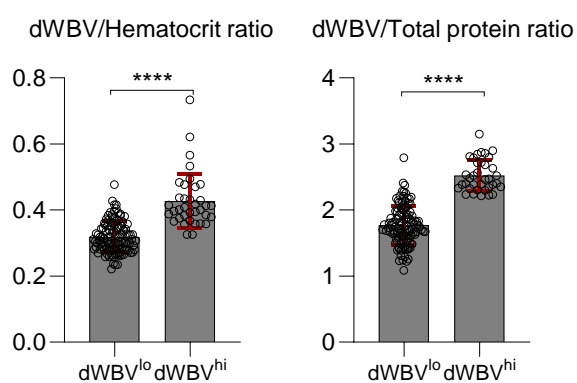

**S1 Fig.** Comparison of the ratio for diastolic WBV to hematocrit (left) and the ratio for diastolic WBV to total protein (right) in patients with low diastolic WBV ( $\leq 16.0$ ,  $n = 112$ ) and high diastolic WBV ( $> 16.0$ ,  $n = 36$ ) groups. \*\*\*\* $P < 0.0001$ .
